# Supplementary material for: A stable Bi2S3 quantum dot–glass nanosystem: size tuneable photocatalytic hydrogen production under solar light
Source: Royal Society of Chemistry journal article supplement (doi:10.1039/c5ra10244h), 2015-01-01
Supplement: c5ra10244h1.pdf [file c5ra10244h1.pdf]

# Electronic Supporting Information

(ESI)

## **A stable Bi<sub>2</sub>S<sub>3</sub> Quantum Dot-Glass nanosystem: Size tuneable photocatalytic hydrogen production under solar light**

Sunil R. Kadam, Rajendra P. Panmand, Ravindra S. Sonawane, Suresh W. Gosavi and Bharat B.

Kale\*

*Centre for Materials for Electronics Technology (C-MET), Department of Electronics and  
Information and Technology (DeitY), Government of India, Panchawati off Pashan road,  
Pune –411008, India*

\*Corresponding author: [bbkale@cmet.gov.in](mailto:bbkale@cmet.gov.in), / [kbbb1@yahoo.com](mailto:kbbb1@yahoo.com),

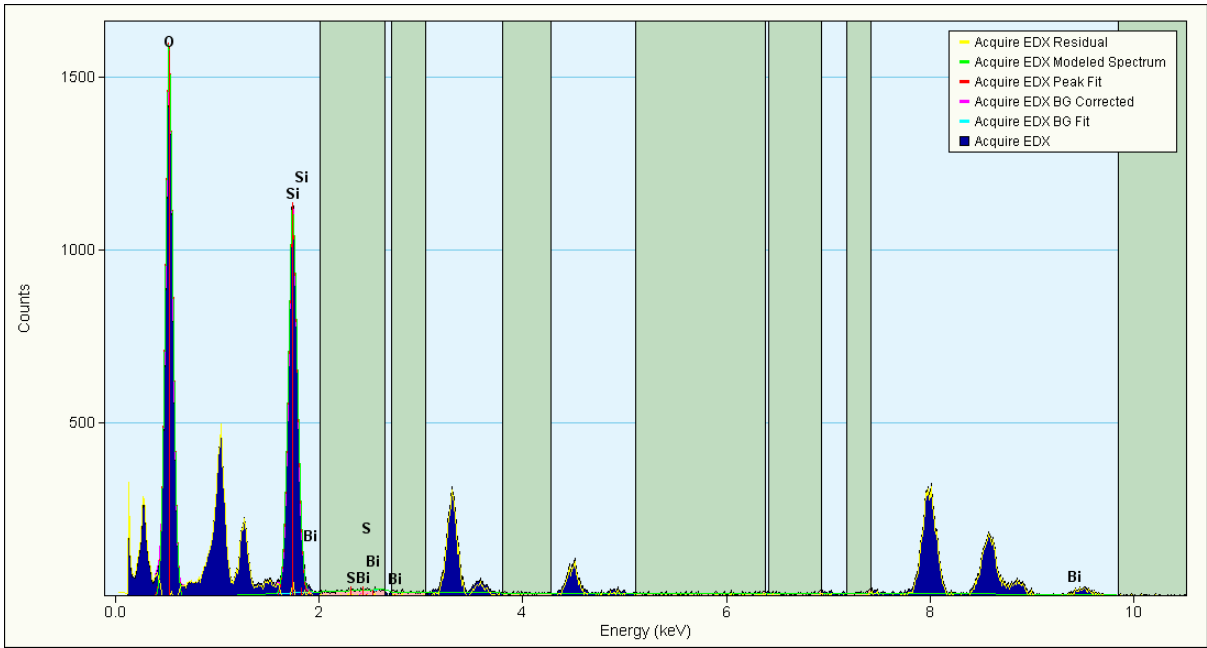

Figure S-1 TEM EDX spectra of GP-14 550 °C sample.

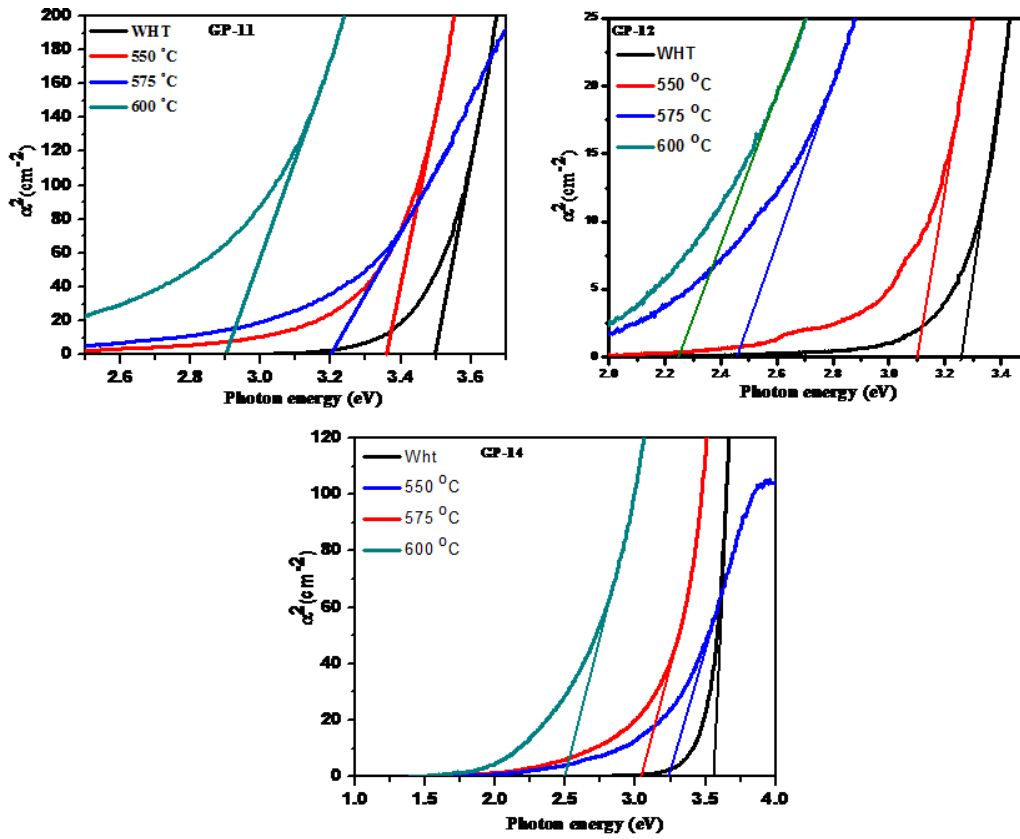

Figure S-2 Tauc plot of Bi<sub>2</sub>S<sub>3</sub> glass GP-11, GP-12 and GP-14.

**Table S-1**

Comparative study of H<sub>2</sub> generation of GP-14 550 °C and bulk Bi<sub>2</sub>S<sub>3</sub> catalyst via photocatalytic H<sub>2</sub>S splitting.

| Average H <sub>2</sub> generation (μmol h <sup>-1</sup> g <sup>-1</sup> ) for GP-14 550 °C | Average H <sub>2</sub> generation (μmol h <sup>-1</sup> g <sup>-1</sup> ) for Bulk Bi <sub>2</sub> S <sub>3</sub> |
|--------------------------------------------------------------------------------------------|-------------------------------------------------------------------------------------------------------------------|
| 6418.8                                                                                     | 1830.6                                                                                                            |

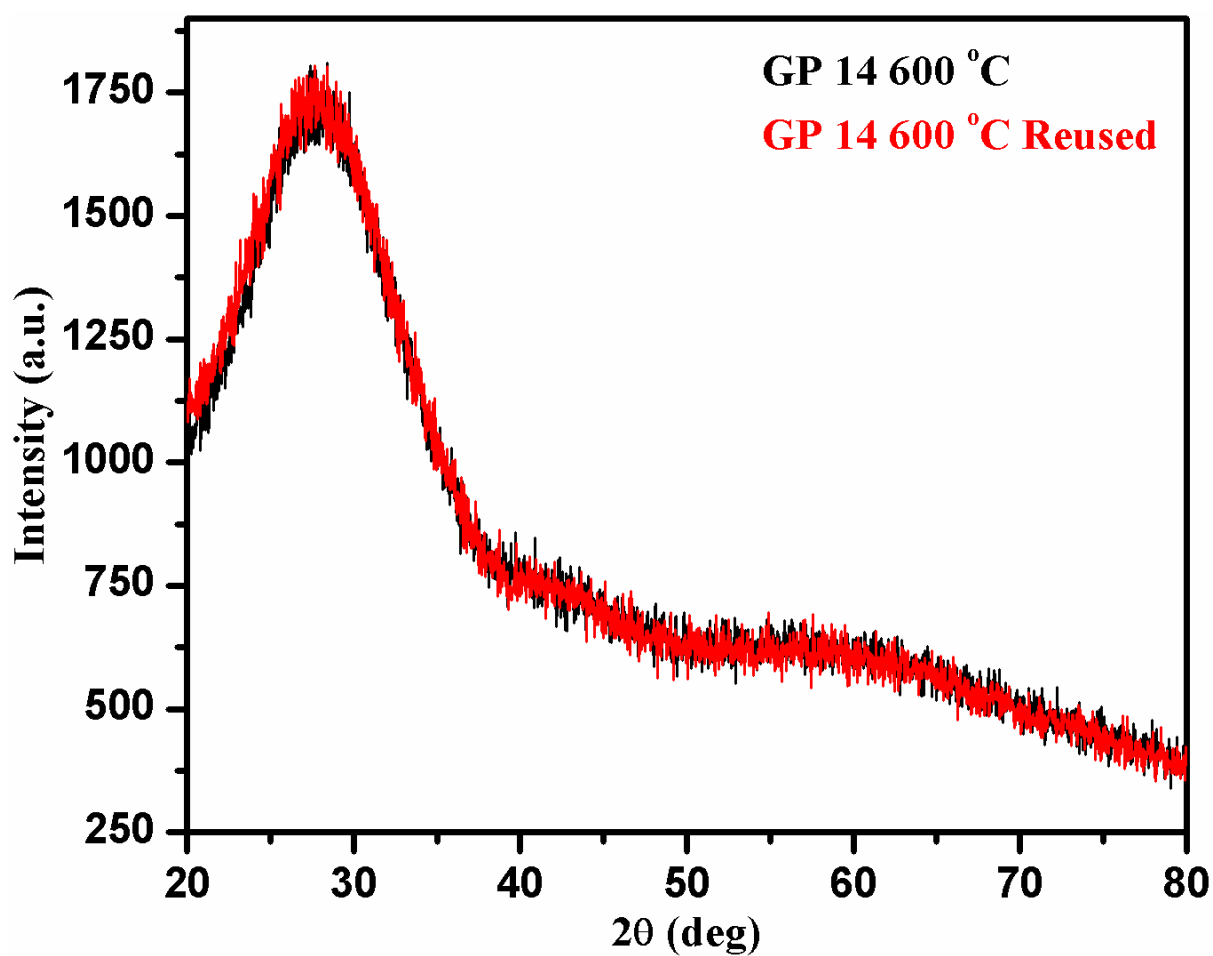

Figure S-3 XRD of GP 14 600 °C and its reused sample.

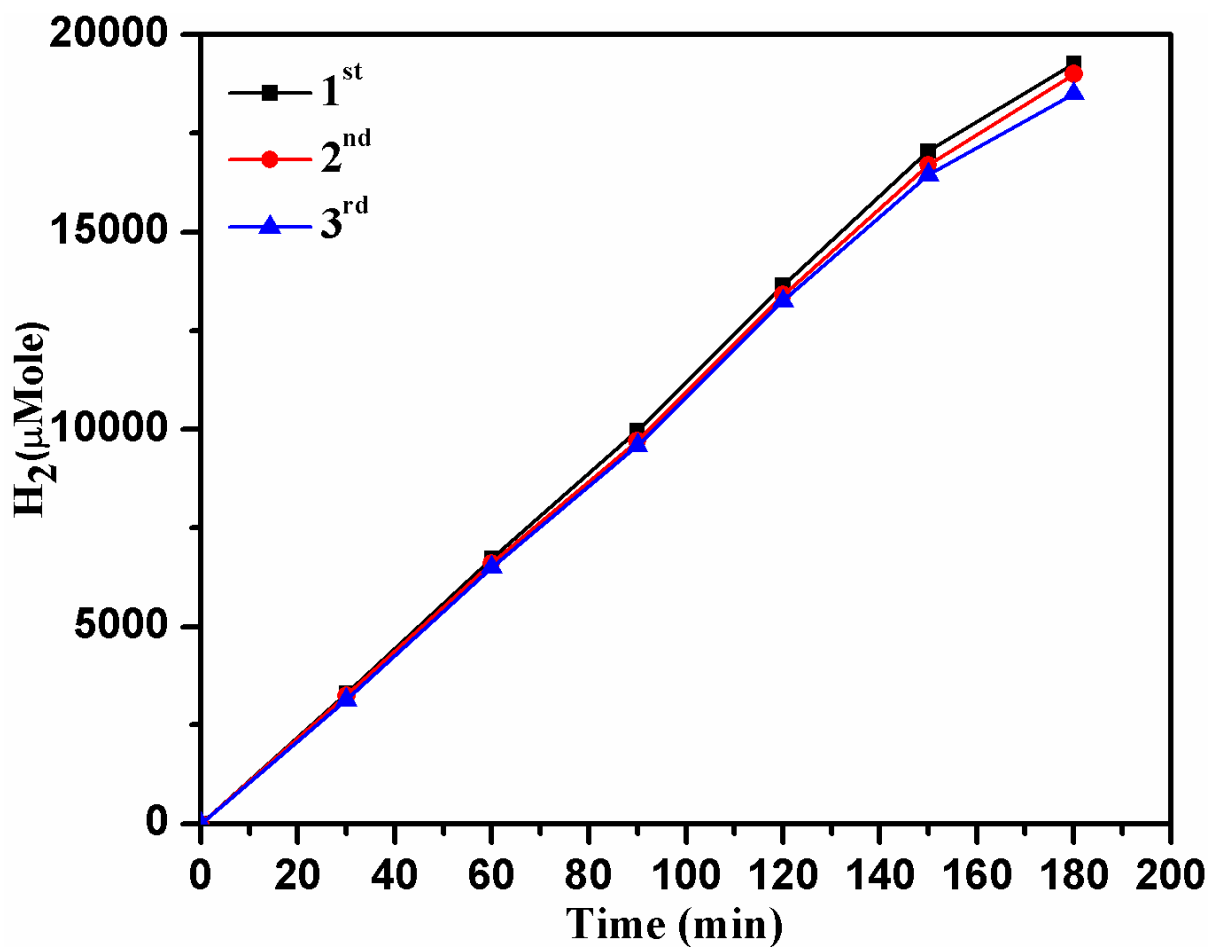

Figure S-4 Photocatalytic H<sub>2</sub> generation study for 2<sup>nd</sup> and 3<sup>rd</sup> run.

Table S-2

Recycled study of H<sub>2</sub> generation of GP-14 (550 °C) catalyst via photocatalytic H<sub>2</sub>S splitting.

| Run no.         | H <sub>2</sub> generation (μMole) |
|-----------------|-----------------------------------|
| 1 <sup>st</sup> | 6418.8                            |
| 2 <sup>nd</sup> | 6333.3                            |
| 3 <sup>rd</sup> | 6166.6                            |
